# Supplementary material for: Effect of Genotype, Year, and Their Interaction on the Accumulation of Bioactive Compounds and the Antioxidant Activity in Industrial Hemp (Cannabis sativa L.) Inflorescences
Source: MDPI journal article supplement (doi:10.3390/ijms24108969), 2023-05-18
Supplement: s1 [file s1]

**Table S1.** Percentage of contribution to the variability for genotype (G), year (Y) and genotype  $\times$  year (G  $\times$  Y) interaction for all the traits analyzed in the inflorescences of the six hemp genotypes grown for three consecutive years (2018-2020).

| Trait                                 | G (%) | Y (%) | G $\times$ Y (%) |
|---------------------------------------|-------|-------|------------------|
| TPC                                   | 12.8  | 67.0  | 17.6             |
| TFC                                   | 2.3   | 88.5  | 7.8              |
| <i><b>Phenolic acids</b></i>          |       |       |                  |
| Gallic acid                           | 10.1  | 55.8  | 31.4             |
| Vanillic acid                         | 14.4  | 43.3  | 32.7             |
| p-Hydroxybenzoic acid                 | 4.9   | 82.4  | 8.5              |
| Caffeic acid                          | 12.2  | 61.7  | 23.6             |
| p-Coumaric acid                       | 12.4  | 70.0  | 13.8             |
| Total phenolic acids                  | 6.4   | 71.6  | 20.5             |
| <i><b>Flavonoids</b></i>              |       |       |                  |
| Epicatechin                           | 14.6  | 52.7  | 29.5             |
| Catechin                              | 31.3  | 20.3  | 42.2             |
| Orientin                              | 2.6   | 93.7  | 2.3              |
| Rutin                                 | 6.4   | 86.1  | 5.7              |
| Vitexin                               | 13.8  | 66.7  | 15.0             |
| Naringenin                            | 7.6   | 56.3  | 32.4             |
| Total flavonoids                      | 6.5   | 88.5  | 3.7              |
| <i><b>Monoterpenes</b></i>            |       |       |                  |
| $\alpha$ -Pinene                      | 20.9  | 47.0  | 23.1             |
| $\beta$ -Pinene                       | 25.8  | 34.0  | 27.2             |
| $\beta$ -Myrcene                      | 18.9  | 48.8  | 17.0             |
| 3-Carene                              | 20.4  | 43.6  | 17.7             |
| $\alpha$ -Phellandrene                | 18.9  | 41.4  | 21.5             |
| Limonene                              | 29.4  | 31.0  | 27.9             |
| <i>trans</i> -Ocimene                 | 19.6  | 43.7  | 26.3             |
| $\gamma$ -Terpinene                   | 28.4  | 23.0  | 43.7             |
| Total monoterpenes                    | 18.9  | 51.1  | 21.8             |
| <i><b>Oxygenated monoterpenes</b></i> |       |       |                  |
| Eucalyptol                            | 23.7  | 24.6  | 46.8             |
| <i>trans</i> -Sabinene hydrate        | 24.5  | 34.8  | 27.1             |
| Fenchol                               | 13.7  | 43.4  | 27.3             |
| <i>trans</i> -2-Pinanol               | 9.6   | 32.7  | 17.8             |
| Terpinen-4-ol                         | 21.2  | 52.3  | 14.5             |
| p-Cymen-8-ol                          | 17.0  | 25.5  | 35.5             |
| $\alpha$ -Terpineol                   | 23.0  | 45.4  | 18.7             |
| Total oxygenated monoterpenes         | 19.6  | 50.1  | 20.7             |
| <i><b>Sesquiterpenes</b></i>          |       |       |                  |
| $\alpha$ -Ylangene                    | 11.1  | 66.9  | 15.5             |
| Isocaryophyllene                      | 13.7  | 55.4  | 15.4             |
| $\beta$ -Caryophyllene                | 22.0  | 59.8  | 13.8             |
| $\alpha$ -Humulene                    | 24.9  | 54.3  | 13.8             |
| Aromadendrene                         | 17.6  | 56.3  | 20.1             |

|                                         |      |      |      |
|-----------------------------------------|------|------|------|
| $\beta$ -Himachalene                    | 25.2 | 37.8 | 29.1 |
| 4,11-Selinadiene                        | 14.1 | 54.7 | 23.9 |
| $\beta$ -Selinene                       | 18.4 | 38.4 | 30.0 |
| $\beta$ -Cadinene                       | 20.9 | 54.1 | 15.6 |
| $\alpha$ -Selinene                      | 16.0 | 42.7 | 32.3 |
| $\beta$ -Curcumene                      | 4.4  | 66.2 | 6.4  |
| ( <i>E</i> )- $\gamma$ -Bisabolene      | 26.1 | 39.9 | 22.8 |
| Cubenene                                | 16.7 | 50.4 | 28.9 |
| $\delta$ -Amorphene                     | 11.7 | 39.0 | 18.4 |
| Selina-3,7(11)-diene                    | 14.7 | 24.5 | 29.0 |
| Total sesquiterpenes                    | 20.3 | 61.0 | 13.3 |
| <b><i>Oxygenated sesquiterpenes</i></b> |      |      |      |
| $\alpha$ -Bisabolol                     | 24.1 | 31.6 | 25.9 |
| Caryophyllene oxide                     | 18.8 | 41.8 | 27.9 |
| Humulene epoxide II                     | 14.6 | 59.6 | 16.5 |
| <i>trans</i> -Longipinocarveol          | 12.0 | 59.7 | 18.6 |
| Longifolenaldehyde                      | 11.8 | 65.7 | 17.8 |
| Alloaromadendrene oxide                 | 15.5 | 48.3 | 22.8 |
| Eudesm-7(11)-en-4-ol                    | 15.5 | 56.2 | 15.6 |
| Clovanediol                             | 12.9 | 62.2 | 17.9 |
| Total oxygenated sesquiterpenes         | 13.6 | 61.3 | 18.8 |
| <b><i>Triterpenes</i></b>               |      |      |      |
| Phytol                                  | 7.5  | 73.3 | 5.7  |
| $\alpha$ -Amyrin                        | 6.0  | 72.7 | 13.5 |
| Total triterpenes                       | 5.9  | 76.5 | 4.5  |
| <b><i>Cannabinoids</i></b>              |      |      |      |
| Cannabidivarin                          | 18.7 | 53.6 | 20.2 |
| Cannabidiol (CBD)                       | 44.6 | 22.0 | 24.5 |
| $\Delta^9$ -Tetrahydrocannabinol (THC)  | 26.4 | 52.9 | 16.6 |
| Cannabigerol (CBG)                      | 46.2 | 26.5 | 24.8 |
| Cannabinol                              | 12.0 | 56.8 | 23.6 |
| Total cannabinoids                      | 34.0 | 36.5 | 21.4 |
| <b><i>Tocopherols</i></b>               |      |      |      |
| $\gamma$ -Tocopherol                    | 11.8 | 63.8 | 17.6 |
| $\alpha$ -Tocopherol                    | 6.8  | 65.3 | 3.9  |
| Total tocopherols                       | 6.6  | 70.1 | 4.1  |
| <b><i>Phytosterols</i></b>              |      |      |      |
| Campesterol                             | 5.9  | 76.4 | 7.6  |
| $\gamma$ -Sitosterol                    | 4.3  | 54.8 | 14.4 |
| Total phytosterols                      | 4.8  | 71.1 | 10.0 |
| Total phytochemicals                    | 26.2 | 55.5 | 13.3 |
| ABTS                                    | 10.2 | 71.9 | 17.5 |
| DPPH                                    | 8.0  | 11.2 | 80.1 |

TPC, total phenolic content; TFC, total flavonoid content; ABTS, 2,2-azinobis-(3-ethylbenzothiazoline-6-sulphonic acid) radical scavenging activity; DPPH, 2,2-diphenyl-1-picrylhydrazyl radical scavenging activity.
