# Supplementary material for: Effect of Genotype, Year, and Their Interaction on the Accumulation of Bioactive Compounds and the Antioxidant Activity in Industrial Hemp (Cannabis sativa L.) Inflorescences
Source: MDPI journal article supplement (doi:10.3390/ijms24108969), 2023-05-18
Supplement: s1 [file s1]

**Table S2.** *Eigenvalues, eigenvectors* and percentage of variation explained by the first eight axes for all the traits analyzed in the inflorescences of the six hemp genotypes grown in three consecutive years (2018-2020).

|                                | Principal Component Axis |        |        |        |        |        |        |        |
|--------------------------------|--------------------------|--------|--------|--------|--------|--------|--------|--------|
|                                | 1                        | 2      | 3      | 4      | 5      | 6      | 7      | 8      |
| <i>Eigenvalues</i>             | 37.74                    | 7.99   | 4.94   | 3.72   | 2.02   | 1.92   | 1.56   | 0.99   |
| PC variation (%)               | 59.0                     | 12.5   | 7.7    | 5.8    | 3.1    | 3.0    | 2.4    | 1.5    |
| Cumulative variation (%)       | 59.0                     | 71.5   | 79.2   | 85.0   | 88.1   | 91.1   | 93.6   | 95.1   |
| Trait                          | <i>Eigenvectors</i>      |        |        |        |        |        |        |        |
| TPC                            | 0.114                    | 0.160  | -0.150 | 0.163  | -0.004 | -0.029 | -0.114 | -0.117 |
| TFC                            | 0.151                    | 0.058  | -0.040 | -0.098 | 0.145  | 0.019  | -0.019 | -0.016 |
| Gallic acid                    | 0.099                    | 0.160  | -0.126 | 0.124  | 0.067  | -0.124 | -0.080 | 0.288  |
| Vanillic acid                  | -0.039                   | 0.214  | 0.132  | 0.214  | 0.071  | 0.267  | 0.049  | 0.198  |
| p-Hydroxybenzoic acid          | -0.074                   | 0.248  | 0.089  | 0.188  | -0.087 | -0.104 | 0.121  | 0.160  |
| Caffeic acid                   | -0.060                   | 0.212  | 0.103  | 0.260  | 0.051  | 0.194  | -0.019 | -0.100 |
| p-Coumaric acid                | 0.092                    | 0.254  | 0.065  | -0.079 | 0.055  | 0.164  | 0.143  | -0.072 |
| Epicatechin                    | 0.010                    | 0.247  | 0.112  | 0.177  | 0.194  | 0.211  | -0.055 | -0.206 |
| Catechin                       | -0.021                   | 0.123  | 0.231  | 0.237  | 0.308  | 0.228  | 0.093  | -0.060 |
| Orientin                       | 0.143                    | 0.133  | -0.081 | -0.060 | 0.081  | 0.086  | -0.053 | -0.070 |
| Rutin                          | 0.141                    | 0.018  | -0.081 | -0.110 | 0.221  | 0.095  | -0.061 | -0.126 |
| Vitexin                        | -0.034                   | 0.268  | 0.045  | 0.198  | -0.059 | -0.162 | 0.200  | 0.181  |
| Naringenin                     | 0.070                    | 0.239  | 0.059  | -0.113 | -0.142 | 0.028  | 0.202  | -0.097 |
| $\alpha$ -Pinene               | 0.144                    | -0.015 | 0.170  | -0.082 | -0.018 | 0.052  | -0.013 | 0.046  |
| $\beta$ -Pinene                | 0.121                    | -0.043 | 0.172  | -0.106 | -0.085 | 0.062  | -0.191 | 0.080  |
| $\beta$ -Myrcene               | 0.146                    | -0.062 | -0.018 | 0.085  | 0.013  | 0.185  | 0.010  | 0.105  |
| 3-Carene                       | 0.145                    | -0.114 | 0.025  | 0.092  | 0.072  | -0.031 | 0.082  | -0.032 |
| $\alpha$ -Phellandrene         | 0.147                    | -0.097 | 0.049  | 0.090  | 0.118  | -0.088 | 0.070  | -0.044 |
| Limonene                       | 0.120                    | -0.126 | -0.039 | 0.208  | 0.158  | 0.062  | 0.024  | 0.136  |
| <i>trans</i> -Ocimene          | 0.119                    | -0.147 | 0.078  | -0.035 | -0.103 | 0.236  | 0.174  | 0.158  |
| $\gamma$ -Terpinene            | 0.074                    | -0.219 | 0.006  | 0.231  | 0.199  | 0.014  | 0.161  | 0.185  |
| Eucalyptol                     | 0.094                    | -0.167 | 0.176  | 0.002  | 0.085  | -0.055 | 0.368  | -0.080 |
| <i>trans</i> -Sabinene hydrate | 0.112                    | -0.191 | -0.057 | 0.150  | 0.048  | 0.048  | 0.212  | -0.024 |
| Fenchol                        | 0.125                    | 0.038  | -0.165 | 0.159  | 0.032  | -0.091 | -0.279 | -0.116 |
| <i>trans</i> -2-Pinanol        | 0.123                    | 0.060  | -0.148 | 0.133  | -0.054 | -0.024 | -0.337 | 0.141  |
| Terpinen-4-ol                  | 0.142                    | -0.085 | -0.098 | 0.091  | 0.072  | 0.124  | 0.068  | -0.036 |
| p-Cymen-8-ol                   | 0.115                    | 0.054  | 0.199  | -0.124 | 0.174  | -0.215 | 0.059  | -0.172 |
| $\alpha$ -Terpineol            | 0.137                    | -0.087 | -0.116 | 0.156  | 0.061  | -0.035 | -0.039 | -0.064 |
| $\alpha$ -Ylangene             | 0.156                    | 0.014  | 0.047  | -0.045 | -0.072 | 0.094  | -0.096 | 0.033  |
| Isocaryophyllene               | 0.147                    | -0.032 | 0.043  | -0.109 | -0.084 | 0.075  | -0.091 | -0.149 |
| $\beta$ -Caryophyllene         | 0.144                    | -0.115 | -0.064 | 0.064  | -0.032 | 0.091  | -0.034 | -0.090 |
| $\alpha$ -Humulene             | 0.136                    | -0.136 | -0.102 | 0.086  | -0.054 | 0.068  | 0.003  | -0.138 |
| Aromadendrene                  | 0.151                    | -0.035 | 0.088  | -0.052 | -0.023 | -0.050 | 0.062  | -0.105 |

|                                       |       |        |        |        |        |        |        |        |
|---------------------------------------|-------|--------|--------|--------|--------|--------|--------|--------|
| $\beta$ -Himachalene                  | 0.134 | 0.012  | 0.209  | -0.083 | 0.093  | -0.069 | -0.095 | -0.073 |
| 4,11-Selinadiene                      | 0.155 | -0.032 | 0.093  | 0.018  | 0.050  | -0.043 | -0.111 | 0.042  |
| $\beta$ -Selinene                     | 0.137 | -0.086 | 0.171  | -0.025 | 0.098  | -0.111 | -0.122 | -0.027 |
| $\beta$ -Cadinene                     | 0.151 | -0.073 | -0.054 | 0.109  | -0.033 | 0.036  | -0.025 | 0.099  |
| $\alpha$ -Selinene                    | 0.144 | -0.037 | 0.157  | -0.013 | 0.104  | -0.115 | -0.130 | -0.016 |
| $\beta$ -Curcumene                    | 0.139 | 0.088  | -0.146 | -0.049 | 0.116  | -0.001 | -0.018 | -0.159 |
| (E)- $\gamma$ -Bisabolene             | 0.130 | -0.164 | -0.022 | 0.160  | -0.013 | 0.007  | 0.005  | 0.103  |
| Cubenene                              | 0.150 | -0.027 | 0.158  | -0.045 | -0.017 | -0.008 | -0.036 | 0.041  |
| $\delta$ -Amorphene                   | 0.153 | -0.074 | 0.079  | 0.025  | -0.027 | 0.033  | 0.002  | 0.083  |
| Selina-3,7(11)-diene                  | 0.132 | -0.015 | 0.205  | -0.026 | 0.094  | -0.054 | -0.207 | 0.097  |
| $\alpha$ -Bisabolol                   | 0.117 | 0.060  | -0.078 | 0.052  | -0.199 | -0.121 | 0.299  | -0.328 |
| Caryophyllene oxide                   | 0.140 | 0.022  | 0.118  | -0.110 | -0.186 | 0.049  | 0.050  | 0.071  |
| Humuleneepoxide II                    | 0.154 | 0.012  | -0.021 | 0.016  | -0.159 | 0.040  | 0.077  | 0.137  |
| <i>trans</i> -Longipinocarveol        | 0.148 | 0.082  | 0.063  | -0.071 | -0.153 | 0.049  | 0.078  | 0.079  |
| Longifolenaldehyde                    | 0.143 | 0.103  | 0.083  | -0.116 | -0.054 | 0.106  | -0.088 | 0.051  |
| Alloaromadendrene oxide               | 0.136 | 0.088  | 0.135  | -0.115 | -0.066 | 0.051  | -0.046 | 0.107  |
| Eudesm-7(11)-en-4-ol                  | 0.156 | 0.006  | -0.040 | 0.068  | -0.125 | 0.020  | 0.004  | 0.100  |
| Clovanediol                           | 0.135 | 0.090  | 0.056  | -0.166 | -0.125 | 0.171  | 0.106  | 0.101  |
| Phytol                                | 0.126 | 0.093  | -0.241 | -0.018 | 0.086  | 0.020  | 0.022  | -0.082 |
| $\alpha$ -Amyrin                      | 0.099 | 0.121  | -0.136 | -0.257 | 0.221  | -0.006 | 0.139  | 0.142  |
| Cannabidivarin                        | 0.149 | 0.039  | -0.062 | 0.081  | -0.089 | -0.059 | 0.045  | -0.250 |
| Cannabidiol (CBD)                     | 0.127 | 0.000  | 0.035  | 0.189  | -0.158 | -0.194 | 0.180  | -0.061 |
| $\Delta$ 9-Tetrahydrocannabinol (THC) | 0.155 | 0.001  | -0.010 | 0.105  | -0.085 | -0.042 | 0.009  | -0.020 |
| Cannabigerol (CBG)                    | 0.022 | 0.051  | -0.188 | -0.284 | 0.421  | -0.023 | 0.182  | 0.245  |
| Cannabinol                            | 0.149 | 0.091  | 0.102  | -0.037 | -0.114 | -0.028 | -0.005 | 0.009  |
| $\gamma$ -Tocopherol                  | 0.114 | 0.152  | -0.164 | 0.055  | -0.222 | -0.018 | -0.011 | 0.200  |
| $\alpha$ -Tocopherol                  | 0.135 | 0.134  | -0.147 | -0.041 | 0.014  | 0.007  | 0.007  | 0.013  |
| Campesterol                           | 0.123 | 0.084  | -0.257 | -0.053 | 0.045  | -0.013 | 0.065  | 0.019  |
| $\gamma$ -Sitosterol                  | 0.112 | 0.106  | -0.242 | -0.083 | 0.001  | -0.067 | 0.106  | 0.028  |
| ABTS                                  | 0.048 | 0.280  | 0.131  | 0.090  | 0.081  | -0.181 | -0.079 | -0.097 |
| DPPH                                  | 0.077 | 0.053  | 0.132  | 0.053  | 0.105  | -0.545 | 0.044  | 0.171  |
