# Supplementary material for: Effect of Genotype, Year, and Their Interaction on the Accumulation of Bioactive Compounds and the Antioxidant Activity in Industrial Hemp (Cannabis sativa L.) Inflorescences
Source: MDPI journal article supplement (doi:10.3390/ijms24108969), 2023-05-18
Supplement: s1 [file s1]

**Table S3.** GC/MS identification information.

| Metabolite                     | Formula                                        | RT <sup>a</sup> | LRI <sup>b</sup> | Identification <sup>c</sup> |
|--------------------------------|------------------------------------------------|-----------------|------------------|-----------------------------|
| $\alpha$ -Pinene               | C <sub>10</sub> H <sub>16</sub>                | 8.29            | 935              | MS, Std, RI                 |
| $\beta$ -Pinene                | C <sub>10</sub> H <sub>16</sub>                | 9.24            | 980              | MS, Std, RI                 |
| $\beta$ -Myrcene               | C <sub>10</sub> H <sub>16</sub>                | 9.47            | 990              | MS, RI                      |
| 3-Carene                       | C <sub>10</sub> H <sub>16</sub>                | 9.89            | 1004             | MS, Std, RI                 |
| $\alpha$ -Phellandrene         | C <sub>10</sub> H <sub>16</sub>                | 10.15           | 1009             | MS, Std, RI                 |
| Limonene                       | C <sub>10</sub> H <sub>16</sub>                | 10.46           | 1015             | MS, Std, RI                 |
| <i>trans</i> -Ocimene          | C <sub>10</sub> H <sub>16</sub>                | 10.88           | 1023             | MS, Std, RI                 |
| Eucalyptol                     | C <sub>10</sub> H <sub>18</sub> O              | 11.16           | 1028             | MS, RI                      |
| $\gamma$ -Terpinene            | C <sub>10</sub> H <sub>16</sub>                | 12.01           | 1044             | MS, Std, RI                 |
| <i>trans</i> -Sabinene hydrate | C <sub>10</sub> H <sub>18</sub> O              | 12.54           | 1054             | MS, RI                      |
| Fenchol                        | C <sub>10</sub> H <sub>18</sub> O              | 12.69           | 1115             | MS, Std, RI                 |
| <i>trans</i> -2-Pinanol        | C <sub>10</sub> H <sub>18</sub> O              | 12.91           | 1124             | MS, RI                      |
| Terpinen-4-ol                  | C <sub>10</sub> H <sub>18</sub> O              | 14.41           | 1179             | MS, RI                      |
| p-Cymenol                      | C <sub>10</sub> H <sub>18</sub> O              | 14.59           | 1186             | MS, RI                      |
| $\alpha$ -Terpineol            | C <sub>10</sub> H <sub>18</sub> O              | 14.77           | 1192             | MS, Std, RI                 |
| $\alpha$ -Ylangene             | C <sub>15</sub> H <sub>24</sub>                | 19.71           | 1379             | MS, RI                      |
| Isocaryophyllene               | C <sub>15</sub> H <sub>24</sub>                | 20.56           | 1412             | MS, RI                      |
| $\beta$ -Caryophyllene         | C <sub>15</sub> H <sub>24</sub>                | 21.23           | 1439             | MS, Std, RI                 |
| $\alpha$ -Humulene             | C <sub>15</sub> H <sub>24</sub>                | 22.01           | 1470             | MS, Std, RI                 |
| Aromadendrene                  | C <sub>15</sub> H <sub>24</sub>                | 22.28           | 1481             | MS, Std, RI                 |
| $\beta$ -Himachalene           | C <sub>15</sub> H <sub>24</sub>                | 22.33           | 1483             | MS, RI                      |
| 4,11-Selinadiene               | C <sub>15</sub> H <sub>24</sub>                | 22.40           | 1486             | MS, RI                      |
| $\beta$ -Selinene              | C <sub>15</sub> H <sub>24</sub>                | 22.48           | 1489             | MS, RI                      |
| $\beta$ -Cadinene              | C <sub>15</sub> H <sub>24</sub>                | 22.53           | 1491             | MS, RI                      |
| $\alpha$ -Selinene             | C <sub>15</sub> H <sub>24</sub>                | 22.76           | 1501             | MS, RI                      |
| $\beta$ -Curcumene             | C <sub>15</sub> H <sub>24</sub>                | 23.05           | 1513             | MS, RI                      |
| (E)- $\gamma$ -Bisabolene      | C <sub>15</sub> H <sub>24</sub>                | 23.33           | 1525             | MS, RI                      |
| Cubenene                       | C <sub>15</sub> H <sub>24</sub>                | 23.43           | 1532             | MS, RI                      |
| $\delta$ -Amorphene            | C <sub>15</sub> H <sub>24</sub>                | 23.70           | 1541             | MS, RI                      |
| Selina-3,7(11)-diene           | C <sub>15</sub> H <sub>24</sub>                | 23.82           | 1546             | MS, RI                      |
| Caryophyllene oxide            | C <sub>15</sub> H <sub>24</sub> O              | 24.80           | 1588             | MS, RI                      |
| Humulene epoxide II            | C <sub>15</sub> H <sub>24</sub> O              | 25.69           | 1614             | MS, RI                      |
| <i>trans</i> -Longipinocarveol | C <sub>15</sub> H <sub>24</sub> O              | 25.90           | 1619             | MS, RI                      |
| Longifolenaldehyde             | C <sub>15</sub> H <sub>24</sub> O              | 26.54           | 1633             | MS, RI                      |
| Alloaromadendrene oxide        | C <sub>15</sub> H <sub>24</sub> O              | 26.83           | 1640             | MS, RI                      |
| $\alpha$ -Bisabolol            | C <sub>15</sub> H <sub>26</sub> O              | 28.18           | 1671             | MS, RI                      |
| Eudesm-7(11)-en-4-ol           | C <sub>15</sub> H <sub>26</sub> O              | 28.40           | 1676             | MS, RI                      |
| Clovanediol                    | C <sub>15</sub> H <sub>26</sub> O <sub>2</sub> | 31,13           | 1881             | MS, RI                      |
| Phytol                         | C <sub>20</sub> H <sub>40</sub> O              | 35.80           | 2081             | MS, RI                      |

|                                        |                                                |       |      |         |
|----------------------------------------|------------------------------------------------|-------|------|---------|
| Cannabidivarin                         | C <sub>19</sub> H <sub>26</sub> O <sub>2</sub> | 37.18 | 2214 | MS, RI  |
| Cannabidiol (CBD)                      | C <sub>21</sub> H <sub>30</sub> O <sub>2</sub> | 39.91 | 2425 | MS, RI  |
| $\Delta^9$ -Tetrahydrocannabinol (THC) | C <sub>21</sub> H <sub>30</sub> O <sub>2</sub> | 40.79 | 2467 | MS, RI  |
| Cannabigerol (CBG)                     | C <sub>21</sub> H <sub>30</sub> O <sub>2</sub> | 41.34 | 2493 | MS, RI  |
| Cannabinol                             | C <sub>21</sub> H <sub>26</sub> O <sub>2</sub> | 41.70 | 2511 | MS, RI  |
| $\gamma$ -Tocopherol                   | C <sub>28</sub> H <sub>48</sub> O <sub>2</sub> | 47.78 | 3026 | MS, Std |
| $\alpha$ -Tocopherol                   | C <sub>29</sub> H <sub>50</sub> O <sub>2</sub> | 49.44 | 3065 | MS, Std |
| Campesterol                            | C <sub>28</sub> H <sub>48</sub> O              | 51.84 | 3215 | MS, Std |
| $\gamma$ -Sitosterol                   | C <sub>29</sub> H <sub>50</sub> O              | 54.40 | 3256 | MS, Std |
| $\alpha$ -Amyrin                       | C <sub>30</sub> H <sub>50</sub> O              | 55.49 | 3274 | MS, Std |

<sup>a</sup>RT, Retention Time (min), compounds are listed in order of their elution from HP-5MS column.

<sup>b</sup>LRI, Linear Retention Index on HP-5MS column experimentally determined using homologous series of C<sub>8</sub>-C<sub>34</sub> alkanes.

<sup>c</sup>Identification methods: MS, comparison of mass spectra with NIST11; Std, comparison of mass spectra with authentic standard compound; RI, comparison of experimental Retention Index with those reported in [55; 56].
